# Supplementary material for: Drought conditions, tillage regime and soil phosphorous modulate the incidence of weeds, pests and pathogens in arable crops
Source: Springer Nature journal article supplement (doi:10.1038/s41598-025-04042-z), 2025-07-08
Supplement: MOESM1 [file 41598_2025_4042_MOESM1_ESM.docx]

SUPPLEMENTARY MATERIAL

**Drought conditions, tillage regime and soil phosphorous modulate the incidence of weeds, pests and pathogens in arable crops**

Francesco Lami1,2*, Francesco Boscutti3, Stefano Barbieri4, Michele Fabro4, Roberta Masin1, Nebojša Nikolić1, Maurizia Sigura3, Lorenzo Marini1

1 DAFNAE, University of Padova, 35020, Legnaro, Padova, Italy

2DISTAL-Department of Agricultural and Food Sciences, University of Bologna, 40127, Bologna, Italy.

3Di4A-Department of Agricultural, Food, Environmental and Animal Sciences, University of Udine, 33100, Udine, Italy.

4ERSA – Agenzia Regionale per lo Sviluppo Rurale - Servizio fitosanitario e chimico, ricerca, sperimentazione e assistenza tecnica, 33050, Pozzuolo del Friuli, Udine, Italy.

*Corresponding author: francesco.lami2@unibo.it

**Running title:** Effects of tillage under drought conditions

**Table S1**. Features of the fields used during the experiment.

| **Pair** | **Field management** | **Distance between fields in a pair (m)** | **Coordinates (WGS 84)** | **Geographical area** | **Years No till** | **Soil humidity probes** |
| --- | --- | --- | --- | --- | --- | --- |
| 1 | Conventional | 160 m | 45°52'14.89"N, 13°01'45.60"E | Rivignano (UD) | - |  |
| 1 | Conservation | 45°52'17.28"N, 13°01'44.51"E | Rivignano (UD) | 15 |  |
| 2 | Conventional | 100 m | 45°51'41.27"N, 13°03'09.59"E | Rivignano (UD) | - | May - October 2018 |
| 2 | Conservation | 45°51'38.98"N, 13°03'13.22"E | Rivignano (UD) | 18 | May - October 2018 |
| 3 | Conventional | 200 m | 45°53'12.72"N, 13°02'25.08"E | Rivignano (UD) | - |  |
| 3 | Conservation | 45°53'07.35"N, 13°02'33.14"E | Rivignano (UD) | 18 |  |
| 4 | Conventional | 80 m | 45°52'15.27"N, 13°02'57.16"E | Rivignano (UD) | - | - |
| 4 | Conservation | 45°52'18.07"N, 13°02'54.87"E | Rivignano (UD) | 14 | - |
| 5 | Conventional | 0 m | 46°02'53.51"N, 13°22'36.91"E | Orsaria (UD) | - | May - October 2018 |
| 5 | Conservation | 46°02'54.32"N, 13°22'37.16"E | Orsaria (UD) | 12 | May - October 2018 |
| 6 | Conventional | 400 m | 46°02'46.22"N, 13°21'42.26"E | Orsaria (UD) | - |  |
| 6 | Conservation | 46°02'43.77"N, 13°21'55.54"E | Orsaria (UD) | 12 |  |
| 7 | Conventional | 900 m | 46°02'15.24"N, 13°21'40.67"E | Orsaria (UD) | - | - |
| 7 | Conservation | 46°02'36.97"N, 13°21'09.03"E | Orsaria (UD) | 12 | - |
| 8 | Conventional | 80 m | 46°01'41.98"N, 13°21'42.06"E | Orsaria (UD) | - | May - October 2018 |
| 8 | Conservation | 46°01'39.93"N, 13°21'36.74"E | Orsaria (UD) | 12 | May - October 2018 |
| 9 | Conventional | 10 m | 46°06'19.51"N, 13°24'14.39"E | Cividale (UD) |  | - |
| 9 | Conservation | 46°06'22.21"N, 13°24'13.88"E | Cividale (UD) | 8 | - |

**Table S2**. Soil features in the experimental fields, including % of sand, silt and clay (calculated on the volume minus the skeleton), water pH, organic carbon content, phosphorous content (Olsen P), barium chloride Cation Exchange Capacity (CEC) and % of sand and skeleton. Field IDs are composed of a number referring to each field pair (1-9) and of either T (conventional tillage) or NT (conservation tillage).

| **Field ID** | | **Sand 2 - 0.1 mm (%)** | **Sand 0.1 - 0.05 mm (%)** | | **Silt 0.05 - 0.02 mm (%)** | **Silt 0.02 - 0.002 mm (%)** | **Clay <0.002 mm (%)** | **pH H2O** | **Ca(CO)3 (%)** | **Organic Carbon** | **Olsen P** | **CEC BaCl2** | **Sand and Skeleton (%)** |
| --- | --- | --- | --- | --- | --- | --- | --- | --- | --- | --- | --- | --- | --- |
| 1NT | 9.5 | | | 6.0 | 23.0 | 47.0 | 14.5 | 7.8 | 59.8 | 1.5 | 11.5 | 13.4 | 15.5 |
| 1T | 15.0 | | | 10.0 | 22.0 | 39.0 | 14.0 | 8.1 | 65.3 | 0.9 | 6.3 | 10.0 | 25.0 |
| 2NT | 8.5 | | | 7.0 | 28.0 | 46.5 | 10.0 | 8.0 | 66.7 | 0.9 | 7.4 | 6.8 | 15.5 |
| 2T | 9.0 | | | 2.0 | 15.0 | 54.0 | 20.0 | 8.1 | 56.9 | 1.1 | 9.9 | 11.8 | 11.0 |
| 3NT | 15.0 | | | 8.5 | 24.0 | 35.5 | 17.0 | 7.9 | 52.1 | 2.0 | 16.6 | 20.0 | 27.7 |
| 3T | 20.0 | | | 12.0 | 29.0 | 27.0 | 12.0 | 8.0 | 47.8 | 1.3 | 17.1 | 11.7 | 32.0 |
| 4NT | 11.5 | | | 11.0 | 26.0 | 35.5 | 16.0 | 7.9 | 42.7 | 1.8 | 20.9 | 17.6 | 22.5 |
| 4T | 22.0 | | | 12.0 | 25.0 | 28.0 | 13.0 | 8.0 | 54.1 | 1.4 | 14.2 | 12.2 | 34.0 |
| 5NT | 17.0 | | | 12.5 | 19.5 | 29.5 | 21.5 | 7.6 | 1.2 | 1.6 | 10.3 | 20.9 | 33.0 |
| 5T | 18.5 | | | 14.5 | 20.0 | 25.5 | 21.5 | 7.8 | 3.9 | 1.6 | 22.2 | 25.2 | 54.1 |
| 6NT | 9.0 | | | 7.5 | 22.0 | 31.5 | 30.0 | 6.9 | 0.6 | 1.4 | 23.6 | 21.1 | 20.7 |
| 6T | 11.5 | | | 8.5 | 22.5 | 32.0 | 25.5 | 7.5 | 0.9 | 1.6 | 30.5 | 22.9 | 36.0 |
| 7NT | 12.0 | | | 9.5 | 25.0 | 30.0 | 23.5 | 7.1 | 0.6 | 1.2 | 18.3 | 18.4 | 21.5 |
| 7T | 18.0 | | | 11.0 | 17.0 | 22.0 | 32.0 | 7.6 | 1.5 | 1.5 | 46.2 | 23.4 | 32.6 |
| 8NT | 15.0 | | | 10.5 | 24.5 | 29.5 | 20.5 | 7.6 | 1.3 | 1.9 | 19.6 | 21.0 | 27.7 |
| 8T | 19.0 | | | 9.0 | 16.0 | 19.0 | 37.0 | 7.3 | 0.7 | 1.5 | 7.0 | 24.6 | 31.6 |
| 9NT | 7.5 | | | 14.5 | 25.0 | 32.5 | 20.5 | 7.6 | 1.6 | 1.5 | 35.6 | 23.5 | 22.0 |
| 9T | 16.0 | | | 17.0 | 23.0 | 27.0 | 17.0 | 7.8 | 12.8 | 1.8 | 24.2 | 21.4 | 33.0 |

**Table S3**. Mean Volumetric Water Content (m3/m3) as detected by ECH2O EC-5 soil humidity probes and ICT Em5b data loggers from June 2018 to October 2018 (soybean period) in field pairs 2, 5 and 8.

|  | **Conservation tillage** | | **Conventional tillage** | |
| --- | --- | --- | --- | --- |
|  | **Drought** | **Rainfed** | **Drought** | **Rainfed** |
| June 18 | 0.276 | 0.312 | 0.221 | 0.293 |
| July 18 | 0.190 | 0.217 | 0.196 | 0.230 |
| August 18 | 0.163 | 0.176 | 0.186 | 0.212 |
| September 18 | 0.176 | 0.200 | 0.185 | 0.230 |
| October 18 | 0.188 | 0.250 | 0.213 | 0.283 |

**Table S4**. Recapitulatory table detailing the number of individuals recorded in each treatment for the main predatory and herbivore arthropod groups in soybean.

| **Predators** | | | | | |
| --- | --- | --- | --- | --- | --- |
|  | **Conservation** | | **Conventional** | |  |
|  | **Rainfed** | **Drought** | **Rainfed** | **Drought** | **Total** |
| Araneae | 16 | 12 | 4 | 21 | 53 |
| Nabidae | 2 | 6 | 2 | 4 | 14 |
| Syrphidae | 3 | 2 | 2 | 0 | 7 |
| Chrysopidae | 1 | 2 | 2 | 0 | 5 |
| Coccinellidae | 0 | 1 | 2 | 2 | 5 |
| Parasitoids | 0 | 2 | 0 | 0 | 2 |
| Other | 1 | 0 | 2 | 2 | 5 |
| **Herbivores** | | | | | |
|  | **Conservation** | | **Conventional** | |  |
|  | **Rainfed** | **Drought** | **Rainfed** | **Drought** | **Total** |
| Pentatomidae | 222 | 236 | 102 | 149 | 709 |
| Auchenorrhyncha | 26 | 13 | 17 | 22 | 78 |
| Orthoptera | 8 | 5 | 9 | 18 | 40 |
| Miridae | 8 | 1 | 7 | 8 | 24 |
| Sminthuridae | 1 | 9 | 2 | 10 | 22 |
| Lepidoptera | 5 | 7 | 1 | 5 | 18 |
| Aphidoidea | 2 | 2 | 2 | 8 | 14 |
| Coleoptera (Curculionidae & Chrysomelidae) | 0 | 3 | 6 | 3 | 12 |
| Thysanoptera | 4 | 1 | 0 | 3 | 8 |
| Aleyrodidae | 1 | 5 | 0 | 2 | 8 |
| Acari | 0 | 2 | 0 | 0 | 2 |
| Other | 1 | 1 | 1 | 0 | 3 |

**Table S5**. List of weed species with presence (1) or absence (0) as recorded in each treatment during photographic surveys.

|  |  | **Conservation tillage** | | **Conventional tillage** | |
| --- | --- | --- | --- | --- | --- |
| **Family** | **Species** | **Rainfed** | **Drought** | **Rainfed** | **Drought** |
| Amarantaceae | *Chenopodium album* L. | 1 | 1 | 1 | 1 |
| Apiaceae | *Daucus carota* L. | 0 | 1 | 0 | 0 |
| *Foeniculum vulgare* Mill. | 1 | 1 | 1 | 1 |
| Asteraceae | *Conyza* sp. | 0 | 1 | 0 | 0 |
| *Erigeron annuus* (L.) Pers. | 1 | 1 | 1 | 1 |
| *Helianthus tuberosus* L. | 0 | 0 | 1 | 0 |
| *Picris hieracioides* L. | 1 | 1 | 1 | 0 |
| *Senecio inaequidens* DC. | 1 | 1 | 1 | 1 |
| *Senecio vulgaris* L. | 1 | 1 | 1 | 1 |
| *Sonchus oleraceus* L. | 1 | 1 | 1 | 1 |
| *Taraxacum officinale* (L.) Weber ex F. H. Wigg | 1 | 1 | 1 | 0 |
| Brassicaceae | *Arabidopsis thaliana* (L.) Heynh. | 1 | 1 | 1 | 1 |
| *Capsella bursa-pastoris* (L.) Medik. | 0 | 0 | 1 | 1 |
| *Cardamine hirsuta* L. | 1 | 1 | 1 | 1 |
| *Draba verna* L. | 0 | 1 | 1 | 1 |
| Caryophyllaceae | *Arenaria serpyllifolia* L. | 1 | 1 | 0 | 0 |
| *Cerastium glomeratum* Thuill. | 1 | 1 | 1 | 1 |
| *Silene vulgaris* (Moench.) Garcke | 0 | 1 | 0 | 0 |
| *Stellaria media* (L.) Vill. | 1 | 1 | 1 | 1 |
| Convolvulaceae | *Convolvulus arvensis* L. | 0 | 0 | 1 | 0 |
| Equisetaceae | *Equisetum arvense* L. | 1 | 1 | 0 | 0 |
| Fabaceae | *Vicia sativa* L. | 1 | 1 | 0 | 0 |
| Geraniaceae | *Geranium purpureum* Vill. | 0 | 0 | 0 | 1 |
| *Geranium rotundifolium* L. | 0 | 0 | 0 | 1 |
| Lamiaceae | *Lamium purpureum* L. | 0 | 1 | 0 | 1 |
| Malvaceae | *Abutilon theophrasti* (Medik.) | 0 | 0 | 0 | 1 |
| Papaveraceae | *Fumaria officinalis* L. | 1 | 1 | 1 | 1 |
| *Papaver rhoeas* L. | 1 | 1 | 1 | 1 |
| Plantaginaceae | *Veronica hederifolia* L. | 1 | 1 | 1 | 1 |
| *Veronica persica* Poir. | 1 | 1 | 1 | 1 |
| Poaceae | *Dactylis glomerata* L. | 0 | 1 | 1 | 1 |
| *Elymus repens* (L.) Gould | 0 | 1 | 1 | 1 |
| *Poa annua* L. | 1 | 1 | 1 | 1 |
| *Poa trivialis* L. | 0 | 1 | 1 | 0 |
| Polygonaceae | *Rumex obtusifolius* L. | 0 | 1 | 0 | 0 |
| Ranunculaceae | *Ranunculus acris* L. | 0 | 0 | 1 | 0 |
| Rubiaceae | *Galium aparine* L. | 1 | 1 | 1 | 0 |
| NA | Morphospecies 1 | 0 | 1 | 0 | 1 |


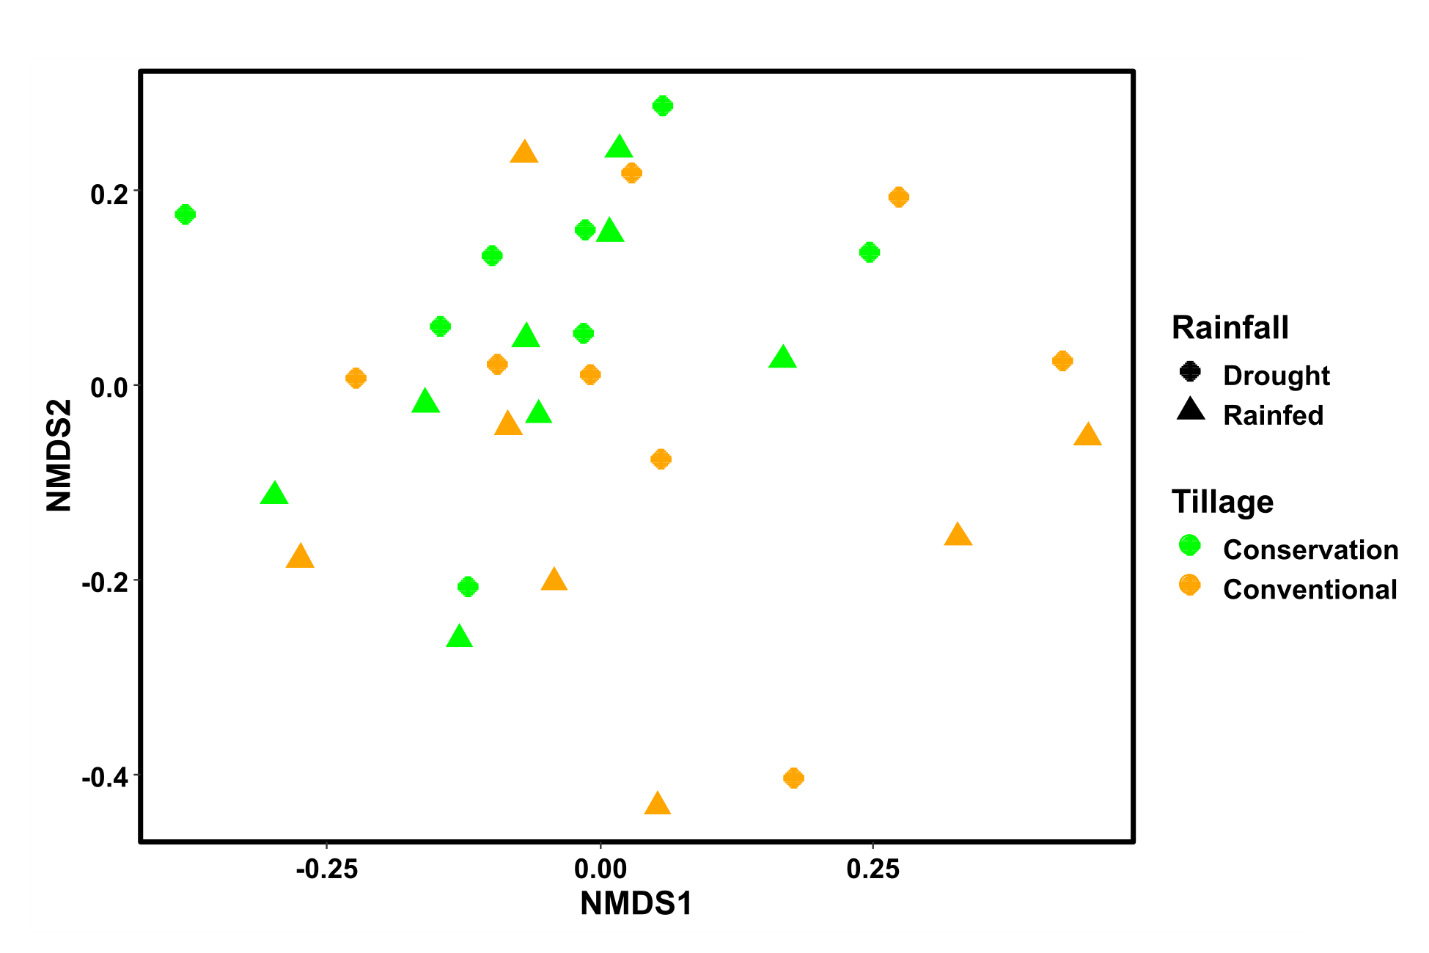


**Figure S1.**Ordination plot based on Nonmetric MultiDimensional Scaling (NMDS) comparing global ecosystem services provision in drought and rainfed treatments, and in conventional and conservation tillage fields. Each dot is a single experimental plot. ANOSIM indicated no significant difference in the overall provision of services between drought and rainfed plots (R = 0.04; p = 0.16), while it showed a near-significant difference between conventional and conservation tillage (R = 0.06; p = 0.08). We used Bray-Curtis distance in both NMDS and ANOSIM.
